# Supplementary material for: Trimethylamine N-oxide (TMAO) as a prognostic marker among patients at nutritional risk
Source: Research Square preprint supplement (doi:10.21203/rs.3.rs-7387652/v1), 2025-09-12
Supplement: Supplementary file 1 [file b5e5ceca5b2d29066b651ef0.docx]

**Appendix**

**Trimethylamine N-oxide (TMAO) as a prognostic marker among patients at nutritional risk**

**A secondary analysis of the randomized clinical trial EFFORT**

Adina Stern1*, Carla Wunderle1*, Pascal Tribolet1,3,4, Peter J. Neyer5, Luca Bernasconi5, Zeno Stanga 6, Beat Mueller1,2, and Philipp Schuetz1,2

1Medical University Department, Division of General Internal and Emergency Medicine, Division of Endocrinology, Diabetes and Metabolism, Kantonsspital Aarau, 5001 Aarau, Switzerland

2Medical Faculty of the University of Basel, 4056 Basel, Switzerland

3Department of Health Professions, Bern University of Applied Sciences, 3008 Bern, Switzerland

4Department of Nutritional Sciences, Faculty of Life Sciences, University of Vienna, Josef-Holaubek-Platz 2, 1090 Vienna, Austria

5Institute of Laboratory Medicine, Kantonsspital Aarau, 5001 Aarau, Switzerland

6Division of Diabetes, Endocrinology, Nutritional Medicine and Metabolism, Bern University Hospital and University of Bern, 3010 Bern, Switzerland

*equally contributing first authors

Correspondence: [schuetzph@gmail.com](mailto:schuetzph@gmail.com)

**Keywords:** TMAO, carnitine, choline, mortality, MACE, nutritional support, clinical outcomes, polymorbid medical inpatient

**Corresponding author & requests for reprints:** Philipp Schuetz, Medical University Department, Division of General Internal and Emergency Medicine, Kantonsspital Aarau, Tellstrasse 25, 5001 Aarau, Switzerland, [schuetzph@gmail.com](mailto:schuetzph@gmail.com)

**Clinical trial registration:** clinicaltrials.gov as NCT02517476 (registered 7 August 2015)

**Tables**

[**Supplemental Table A.1 Baseline characteristics demonstrating the main EFFORT population, and stratified by population not included in this analysis and included in TMAO analysis** 3](#_Toc202529106)

[**Supplemental Table A.2 Association of baseline characteristics with TMAO concentrations at time of admission** 4](#_Toc202529107)

[**Supplemental Table A.3 Association of nutritional baseline characteristics with TMAO concentrations at time of admission** 5](#_Toc202529108)

[**Supplemental Table A.4 Associations of carnitine concentration with all-cause mortality and major cardiovascular events (MACE)** 6](#_Toc202529109)

[**Supplemental Table A.5 Associations of choline concentration with all-cause mortality and major cardiovascular events (MACE)** 7](#_Toc202529110)

**Figures**

[**Supplemental Figure A.1 Study Flow Chart** 8](#_Toc202529113)

[**Supplemental Figure A.2 Kaplan Meier survival analysis regarding TMAO quartiles and time to death within 5 years** 9](#_Toc202529114)

[**Supplemental Figure A.3 Forest plot for the effect of nutritional therapy on major adverse cardiovascular events (MACE)** 10](#_Toc202529115)

**Supplemental Table A.1 Baseline characteristics demonstrating the main EFFORT population, and stratified by population not included in this analysis and included in TMAO analysis**

| **Supplemental Table A.1** | |  |  |  |  |
| --- | --- | --- | --- | --- | --- |
| Baseline characteristics demonstrating the main EFFORT population, and stratified by population not included in this analysis and included in TMAO analysis | | | | | |
|  |  | **Overall EFFORT population** | **EFFORT population not included in subanalysis** | **TMAO subanalysis group** | **p-valuea** |
| **Sociodemographics** | |  |  |  |  |
|  | Patient number, n | 2028 | 1810 | 218 |  |
|  | Male sex, n | 1064 (52.5%) | 939 (51.9%) | 125 (57.3%) | 0.13 |
|  | Age years, mean (SD) | 72.6 (14.1) | 72.5 (14.1) | 73.4 (13.6) | 0.34 |
| **Nutritional assessment** | |  |  |  |  |
|  | BMI, mean (SD), kg/m² | 24.8 (5.3) | 24.8 (5.4) | 24.4 (5.0) | 0.24 |
|  | Weight at admission, mean (SD), kg | 70.9 (16.7) | 71.0 (16.8) | 69.8 (15.1) | 0.45 |
| **NRS total score, n** | |  |  |  |  |
|  | 3 | 624 (30.8%) | 567 (31.3%) | 57 (26.1%) | 0.002 |
|  | 4 | 775 (38.2%) | 702 (38.8%) | 73 (33.5%) |  |
|  | 5 | 524 (25.8%) | 444 (24.5%) | 80 (36.7%) |  |
|  | ≥6 | 105 (5.2%) | 97 (5.4%) | 8 (3.7%) |  |
| **Intervention group, n** | | 1015 (50.0%) | 910 (50.3%) | 105 (48.2%) | 0.56 |
| **Main diagnosis, n** | |  |  |  |  |
|  | Infection | 613 (30.2%) | 552 (30.5%) | 61 (28.0%) | 0.44 |
|  | Cancer | 374 (18.4%) | 306 (16.9%) | 68 (31.2%) | <0.001 |
|  | Cardiovascular disease | 205 (10.1%) | 183 (10.1%) | 22 (10.1%) | 0.99 |
|  | Frailty | 194 (9.6%) | 182 (10.1%) | 12 (5.5%) | 0.031 |
|  | Lung disease | 125 (6.2%) | 116 (6.4%) | 9 (4.1%) | 0.19 |
|  | Gastrointestinal disease | 164 (8.1%) | 152 (8.4%) | 12 (5.5%) | 0.14 |
|  | Neurological disorders | 95 (4.7%) | 92 (5.1%) | 3 (1.4%) | 0.014 |
|  | Renal disease | 68 (3.4%) | 53 (2.9%) | 15 (6.9%) | 0.002 |
|  | Metabolic disease | 62 (3.1%) | 56 (3.1%) | 6 (2.8%) | 0.78 |
|  | Other diseases | 55 (2.7%) | 53 (2.9%) | 2 (0.9%) | 0.084 |
| **Other Comorbidities, n** | |  |  |  |  |
|  | Hypertension | 1109 (54.7%) | 983 (54.3%) | 126 (57.8%) | 0.33 |
|  | Malignant disease | 667 (32.9%) | 564 (31.2%) | 103 (47.2%) | <0.001 |
|  | Renal insufficiency | 641 (31.6%) | 567 (31.3%) | 74 (33.9%) | 0.43 |
|  | Coronary heart disease | 566 (27.9%) | 512 (28.3%) | 54 (24.8%) | 0.27 |
|  | Diabetes mellitus | 428 (21.1%) | 387 (21.4%) | 41 (18.8%) | 0.38 |
|  | Congestive heart failure | 353 (17.4%) | 312 (17.2%) | 41 (18.8%) | 0.56 |
|  | Chronic obstructive pulmonary disease | 303 (14.9%) | 279 (15.4%) | 24 (11.0%) | 0.085 |
|  | Peripheral artery disease | 186 (9.2%) | 162 (9.0%) | 24 (11.0%) | 0.32 |
|  | Cerebrovascular disease | 162 (8.0%) | 138 (7.6%) | 24 (11.0%) | 0.082 |
|  | Dementia | 75 (3.7%) | 65 (3.6%) | 10 (4.6%) | 0.46 |

ap-values represent comparisons between the overall EFFORT study population not included in this subanalysis and the TMAO subanalysis group.

EFFORT, Effect of Early Nutritional Support on Frailty, Functional Outcomes, and Recovery of Malnourished Medical Inpatients Trial. TMAO, Trimethylamine N-oxide. IQR, interquartile range. n, number, %, percentage. SD, standard deviation. NRS, Nutritional Risk Screening 2002. BMI, body mass index.

**Supplemental Table A.2 Association of baseline characteristics with TMAO concentrations at time of admission**

| **Supplemental Table A.2** | |  |  |
| --- | --- | --- | --- |
| Association of baseline characteristics with TMAO concentrations at time of admission | | |  |
|  |  | **overall univariate** | **overall multivariate** |
|  |  | Coefficient (95%CI) p-value | Coefficient (95%CI) p-value |
| **Sociodemographics** | |  |  |
|  | Male sex | 0.20 (-0.13 to 0.54) p=0.239 | 0.21 (-0.10 to 0.52) p=0.182 |
|  | Age | 0.02 (0.01 to 0.03) p=0.001 | 0.02 (0.00 to 0.03) p=0.006 |
| **Biomarkers** | |  |  |
|  | Carnitine | 0.01 (0.01 to 0.02) p<0.001 | 0.01 (0.01 to 0.02) p<0.001 |
|  | Choline | 0.07 (0.04 to 0.10) p<0.001 | 0.04 (0.01 to 0.07) p=0.010 |
|  | CRP | 0.00 (-0.01 to 0.00) p<0.001 |  |
| **Main Diagnosis** | |  |  |
|  | Infection | -0.81 (-1.17 to -0.46) p<0.001 | -1.12 (-1.51 to -0.74) p<0.001 |
|  | Cancer | -0.38 (-0.74 to -0.02) p=0.037 | -0.73 (-1.11 to -0.35) p<0.001 |
|  | Cardiovascular disease | 0.41 (-0.14 to 0.96) p=0.143 | -0.54 (-1.11 to 0.02) p=0.060 |
|  | Frailty | 0.84 (0.11 to 1.56) p=0.023 | 0.08 (-0.58 to 0.74) p=0.815 |
|  | Lung disease | -0.16 (-1.00 to 0.68) p=0.704 |  |
|  | Gastrointestinal disease | 0.65 (-0.07 to 1.38) p=0.078 |  |
|  | Neurological disorder | -0.07 (-1.50 to 1.37) p=0.927 |  |
|  | Renal disease | 1.80 (1.18 to 2.41) p<0.001 |  |
|  | Metabolic disease | 0.47 (-0.55 to 1.49) p=0.365 |  |
|  | Other | 0.75 (-1.0 to 2.51) p=0.396 |  |
| **Comorbidities** | |  |  |
|  | Hypertension | 0.50 (0.16 to 0.83) p=0.004 | 0.20 (-0.11 to 0.50) p=0.201 |
|  | Malignant disease | -0.18 (-0.51 to 0.15) p=0.287 |  |
|  | Renal Insufficiency | 1.02 (0.69 to 1.34) p<0.001 | 0.79 (0.48 to 1.09) p<0.001 |
|  | Coronary heart disease | 0.26 (-0.12 to 0.65) p=0.184 |  |
|  | Diabetes mellitus | 0.73 (0.32 to 1.15) p=0.001 | 0.36 (-0.01 to 0.74) p=0.057 |
|  | Congestive heart failure | 0.70 (0.28 to 1.12) p=0.001 | 0.36 (-0.05 to 0.76) p=0.087 |
|  | Chronic obstructive pulmonary disease | -0.22 (-0.75 to 0.32) p=0.426 |  |
|  | Peripheral artery disease | 0.87 (0.35 to 1.39) p=0.001 |  |
|  | Stroke | 0.25 (-0.28 to 0.79) p=0.347 |  |
|  | Dementia | 0.00 (-0.79 to 0.80) p=0.990 |  |

TMAO, Trimethylamine N-oxide. CI, confidence interval. CRP, C-reactive protein.

The final multivariate model for sociodemographic predictors included sex, age, body mass index (BMI), NRS total score, and the precursors of TMAO (choline and carnitine). The clinical model included primary diagnoses (infection, cancer, cardiovascular disease, and frailty) and relevant comorbidities such as hypertension, renal insufficiency, diabetes mellitus, and heart failure.

**Supplemental Table A.3 Association of nutritional baseline characteristics with TMAO concentrations at time of admission**

| **Supplemental Table A.3** | |  |  |
| --- | --- | --- | --- |
| Association of nutritional baseline characteristics with TMAO concentrations at time of admission | | | |
|  |  | **overall univariate** | **overall multivariate** |
|  |  | Coefficient (95%CI) p-value | Coefficient (95%CI) p-value |
| **Nutritional status** | |  |  |
| Weight (kg) | | -0.01 (-0.02 to 0.01) p=0.364 |  |
| Height (cm) | | 0.02 (0.00 to 0.03) p=0.130 |  |
| BMI (kg/m2) | | -0.02 (-0.06 to 0.01) p=0.164 | -0.03 (-0.06 to 0.00) p=0.043 |
| NRS total score | | -0.03 (-0.23 to 0.16) p=0.738 |  |
|  | 4 | -0.09 (-0.53 to 0.35) p=0.688 | -0.24 (-0.65 to 0.16) p=0.238 |
|  | 5 | -0.11 (-0.53 to 0.32) p=0.630 | -0.27 (-0.68 to 0.13) p=0.181 |
|  | 6 | 0.03 (-0.91 to 0.96) p=0.954 | -0.34 (-1.20 to 0.52) p=0.433 |
| Weight loss | |  |  |
|  | weight loss > 5% in 3 months | -0.10 (-0.52 to 0.32) p=0.633 |  |
|  | weight loss > 5% in 2 months | -0.18 (-0.68 to 0.32) p=0.488 |  |
|  | weight loss > 5% in 1 month | 0.09 (-0.38 to 0.57) p=0.699 |  |
| Loss of appetite | | -0.47 (-0.98 to 0.03) p=0.066 |  |
| Reduced food intake | |  |  |
|  | less than 50-75% | -0.10 (-0.70 to 0.50) p=0.744 |  |
|  | less than 25-50 % | -0.37 (-0.94 to 0.19) p=0.194 |  |
|  | less than 25 % | -0.20 (-0.83 to 0.42) p=0.522 |  |
| Severity of illness | |  |  |
|  | none or mild | -0.21 (-1.61 to 1.20) p=0.771 |  |
|  | moderate | -0.82 (-2.24 to 0.60) p=0.256 |  |
|  | severe | -0.49 (-3.27 to 2.29) p=0.728 |  |

The final multivariate model for sociodemographic predictors included sex, age, body mass index (BMI), NRS total score, and the precursors of TMAO (carnitine and choline).

**Supplemental Table A.4 Associations of carnitine concentration with all-cause mortality and major cardiovascular events (MACE)**

| **Supplemental Table A.4** |  |  |  |  |
| --- | --- | --- | --- | --- |
| Associations of carnitine concentration with all-cause mortality and major cardiovascular events (MACE) | | | | |
|  |  |  |  |  |
| **30-day mortality** |  |  |  |  |
|  | **Survivors**  **(n = 167)** | **Non-Survivors**  **(n = 51)** | **Unadjusted**  HR (95% Cl) p-value | **Adjusted**  HR (95% Cl) p-value |
|  |  |  |  |  |
| **Carnitine, first quartile, n** | 47 (28.1%) | 8 (15.7%) | *Reference* | *Reference* |
| **Carnitine, second quartile, n** | 40 (24.0%) | 14 (27.5%) | 1.93 (0.81 to 4.61) p=0.137 | 1.61 (0.66 to 3.88) p=0.292 |
| **Carnitine, third quartile, n** | 39 (23.4%) | 16 (31.4%) | 2.21 (0.94 to 5.16) p=0.068 | 1.99 (0.85 to 4.67) p=0.114 |
| **Carnitine, fourth quartile, n** | 41 (24.6%) | 13 (25.5%) | 1.73 (0.72 to 4.18) p=0.222 | 1.47 (0.60 to 3.60) p=0.404 |
|  |  |  |  |  |
|  |  |  |  |  |
|  |  |  |  |  |
| **180-day mortality** |  |  |  |  |
|  | **Survivors**  **(n = 126)** | **Non-Survivors**  **(n = 92)** | **Unadjusted**  HR (95% Cl) p-value | **Adjusted**  HR (95% CI) p-value |
|  |  |  |  |  |
| **Carnitine, first quartile, n** | 33 (26.2%) | 22 (23.9%) | *Reference* | *Reference* |
| **Carnitine, second quartile, n** | 32 (25.4%) | 22 (23.9%) | 1.12 (0.62 to 2.02) p=0.707 | 0.92 (0.50 to 1.67) p=0.774 |
| **Carnitine, third quartile, n** | 32 (25.4%) | 23 (25.0%) | 1.18 (0.66 to 2.13) p=0.569 | 1.15 (0.64 to 2.06) p=0.649 |
| **Carnitine, fourth quartile, n** | 29 (23.0%) | 25 (27.2%) | 1.23 (0.69 to 2.19) p=0.474 | 1.03 (0.57 to 1.85) p=0.933 |
|  |  |  |  |  |
|  |  |  |  |  |
|  |  |  |  |  |
| **5-year mortality** |  |  |  |  |
|  | **Survivors**  **(n = 73)** | **Non-Survivors**  **(n = 145)** | **Unadjusted**  HR (95% Cl) p-value | **Adjusted**  HR (95% CI) p-value |
|  |  |  |  |  |
| **Carnitine, first quartile, n** | 19 (26.0%) | 36 (24.8%) | *Reference* | *Reference* |
| **Carnitine, second quartile, n** | 22 (30.1%) | 32 (22.1%) | 0.91 (0.56 to 1.46) p=0.690 | 0.76 (0.47 to 1.23) p=0.266 |
| **Carnitine, third quartile, n** | 19 (26.0%) | 36 (24.8%) | 1.08 (0.68 to 1.72) p=0.736 | 1.07 (0.67 to 1.70) p=0.789 |
| **Carnitine, fourth quartile, n** | 13 (17.8%) | 41 (28.3%) | 1.26 (0.81 to 1.98) p=0.304 | 1.10 (0.69 to 1.74) p=0.692 |
|  |  |  |  |  |
|  |  |  |  |  |
|  |  |  |  |  |
| **MACE (major adverse cardiovascular events)** | | |  |  |
|  | **No MACE**  **(n = 166)** | **MACE**  **(n = 52)** | **Unadjusted**  HR (95% Cl) p-value | **Adjusted**  HR (95% CI) p-value |
|  |  |  |  |  |
| **Carnitine, first quartile, n** | 47 (28.3%) | 8 (15.4%) | *Reference* | *Reference* |
| **Carnitine, second quartile, n** | 39 (23.5%) | 15 (28.8%) | 2.26 (0.87 to 5.89) p=0.095 | 1.87 (0.70 to 5.04) p=0.213 |
| **Carnitine, third quartile, n** | 39 (23.5%) | 16 (30.8%) | 2.41 (0.93 to 6.23) p=0.069 | 2.14 (0.81 to 5.65) p=0.124 |
| **Carnitine, fourth quartile, n** | 41 (24.7%) | 13 (25.0%) | 1.86 (0.70 to 4.94) p=0.211 | 1.51 (0.55 to 4.15) p=0.425 |

MACE, major adverse cardiovascular events. n, number, %, percentage. HR, hazard ratio. CI, confidence interval.

**Supplemental Table A.5 Associations of choline concentration with all-cause mortality and major cardiovascular events (MACE)**

| **Supplemental Table A.5** |  |  |  |  |
| --- | --- | --- | --- | --- |
| Associations of choline concentration with all-cause mortality and major cardiovascular events (MACE) | | | | |
|  |  |  |  |  |
| **30-day mortality** |  |  |  |  |
|  | **Survivors**  **(n = 167)** | **Non-Survivors**  **(n = 51)** | **Unadjusted**  HR (95% Cl) p-value | **Adjusted**  HR (95% Cl) p-value |
|  |  |  |  |  |
| **Choline, first quartile, n** | 45 (26.9%) | 10 (19.6%) | *Reference* | *Reference* |
| **Choline, second quartile, n** | 42 (25.1%) | 12 (23.5%) | 1.24 (0.54 to 2.88) p=0.612 | 1.24 (0.54 to 2.88) p=0.612 |
| **Choline, third quartile, n** | 41 (24.6%) | 14 (27.5%) | 1.39 (0.62 to 3.13) p=0.424 | 1.39 (0.62 to 3.13) p=0.424 |
| **Choline, fourth quartile, n** | 39 (23.4%) | 15 (29.4%) | 1.57 (0.71 to 3.50) p=0.267 | 1.57 (0.71 to 3.50) p=0.267 |
|  |  |  |  |  |
|  |  |  |  |  |
|  |  |  |  |  |
| **180-day mortality** |  |  |  |  |
|  | **Survivors**  **(n = 126)** | **Non-Survivors**  **(n = 92)** | **Unadjusted**  HR (95% Cl) p-value | **Adjusted**  HR (95% CI) p-value |
|  |  |  |  |  |
| **Choline, first quartile, n** | 32 (25.4%) | 23 (25.0%) | *Reference* | *Reference* |
| **Choline, second quartile, n** | 33 (26.2%) | 21 (22.8%) | 0.93 (0.51 to 1.67) p=0.801 | 0.93 (0.51 to 1.67) p=0.801 |
| **Choline, third quartile, n** | 32 (25.4%) | 23 (25.0%) | 1.00 (0.56 to 1.78) p=0.997 | 1.00 (0.56 to 1.78) p=0.997 |
| **Choline, fourth quartile, n** | 29 (23.0%) | 25 (27.2%) | 1.14 (0.64 to 2.00) p=0.660 | 1.14 (0.64 to 2.00) p=0.660 |
|  |  |  |  |  |
|  |  |  |  |  |
|  |  |  |  |  |
| **5-year mortality** |  |  |  |  |
|  | **Survivors**  **(n = 73)** | **Non-Survivors**  **(n = 145)** | **Unadjusted**  HR (95% Cl) p-value | **Adjusted**  HR (95% CI) p-value |
|  |  |  |  |  |
| **Choline, first quartile, n** | 21 (28.8%) | 34 (23.4%) | *Reference* | *Reference* |
| **Choline, second quartile, n** | 14 (19.2%) | 40 (27.6%) | 1.20 (0.76 to 1.90) p=0.428 | 1.20 (0.76 to 1.90) p=0.428 |
| **Choline, third quartile, n** | 20 (27.4%) | 35 (24.1%) | 1.01 (0.63 to 1.61) p=0.982 | 1.01 (0.63 to 1.61) p=0.982 |
| **Choline, fourth quartile, n** | 18 (24.7%) | 36 (24.8%) | 1.17 (0.73 to 1.87) p=0.517 | 1.17 (0.73 to 1.87) p=0.517 |
|  |  |  |  |  |
|  |  |  |  |  |
|  |  |  |  |  |
| **MACE (major adverse cardiovascular events)** | |  |  |  |
|  | **No MACE**  **(n = 166)** | **MACE**  **(n = 52)** | **Unadjusted**  HR (95% Cl) p-value | **Adjusted**  HR (95% CI) p-value |
|  |  |  |  |  |
| **Choline, first quartile, n (%)** | 45 (27.1%) | 10 (19.2%) | *Reference* | *Reference* |
| **Choline, second quartile, n (%)** | 42 (25.3%) | 12 (23.1%) | 1.29 (0.50 to 3.29) p=0.600 | 1.30 (0.49 to 3.45) p=0.594 |
| **Choline, third quartile, n (%)** | 40 (24.1%) | 15 (28.8%) | 1.69 (0.68 to 4.18) p=0.258 | 1.36 (0.53 to 3.46) p=0.520 |
| **Choline, fourth quartile, n (%)** | 39 (23.5%) | 15 (28.8%) | 1.73 (0.70 to 4.29) p=0.236 | 1.58 (0.61 to 4.06) p=0.346 |

MACE, major adverse cardiovascular events. n, number, %, percentage. HR, hazard ratio. CI, confidence interval.

**Supplemental Figure A.1 Study Flow Chart**


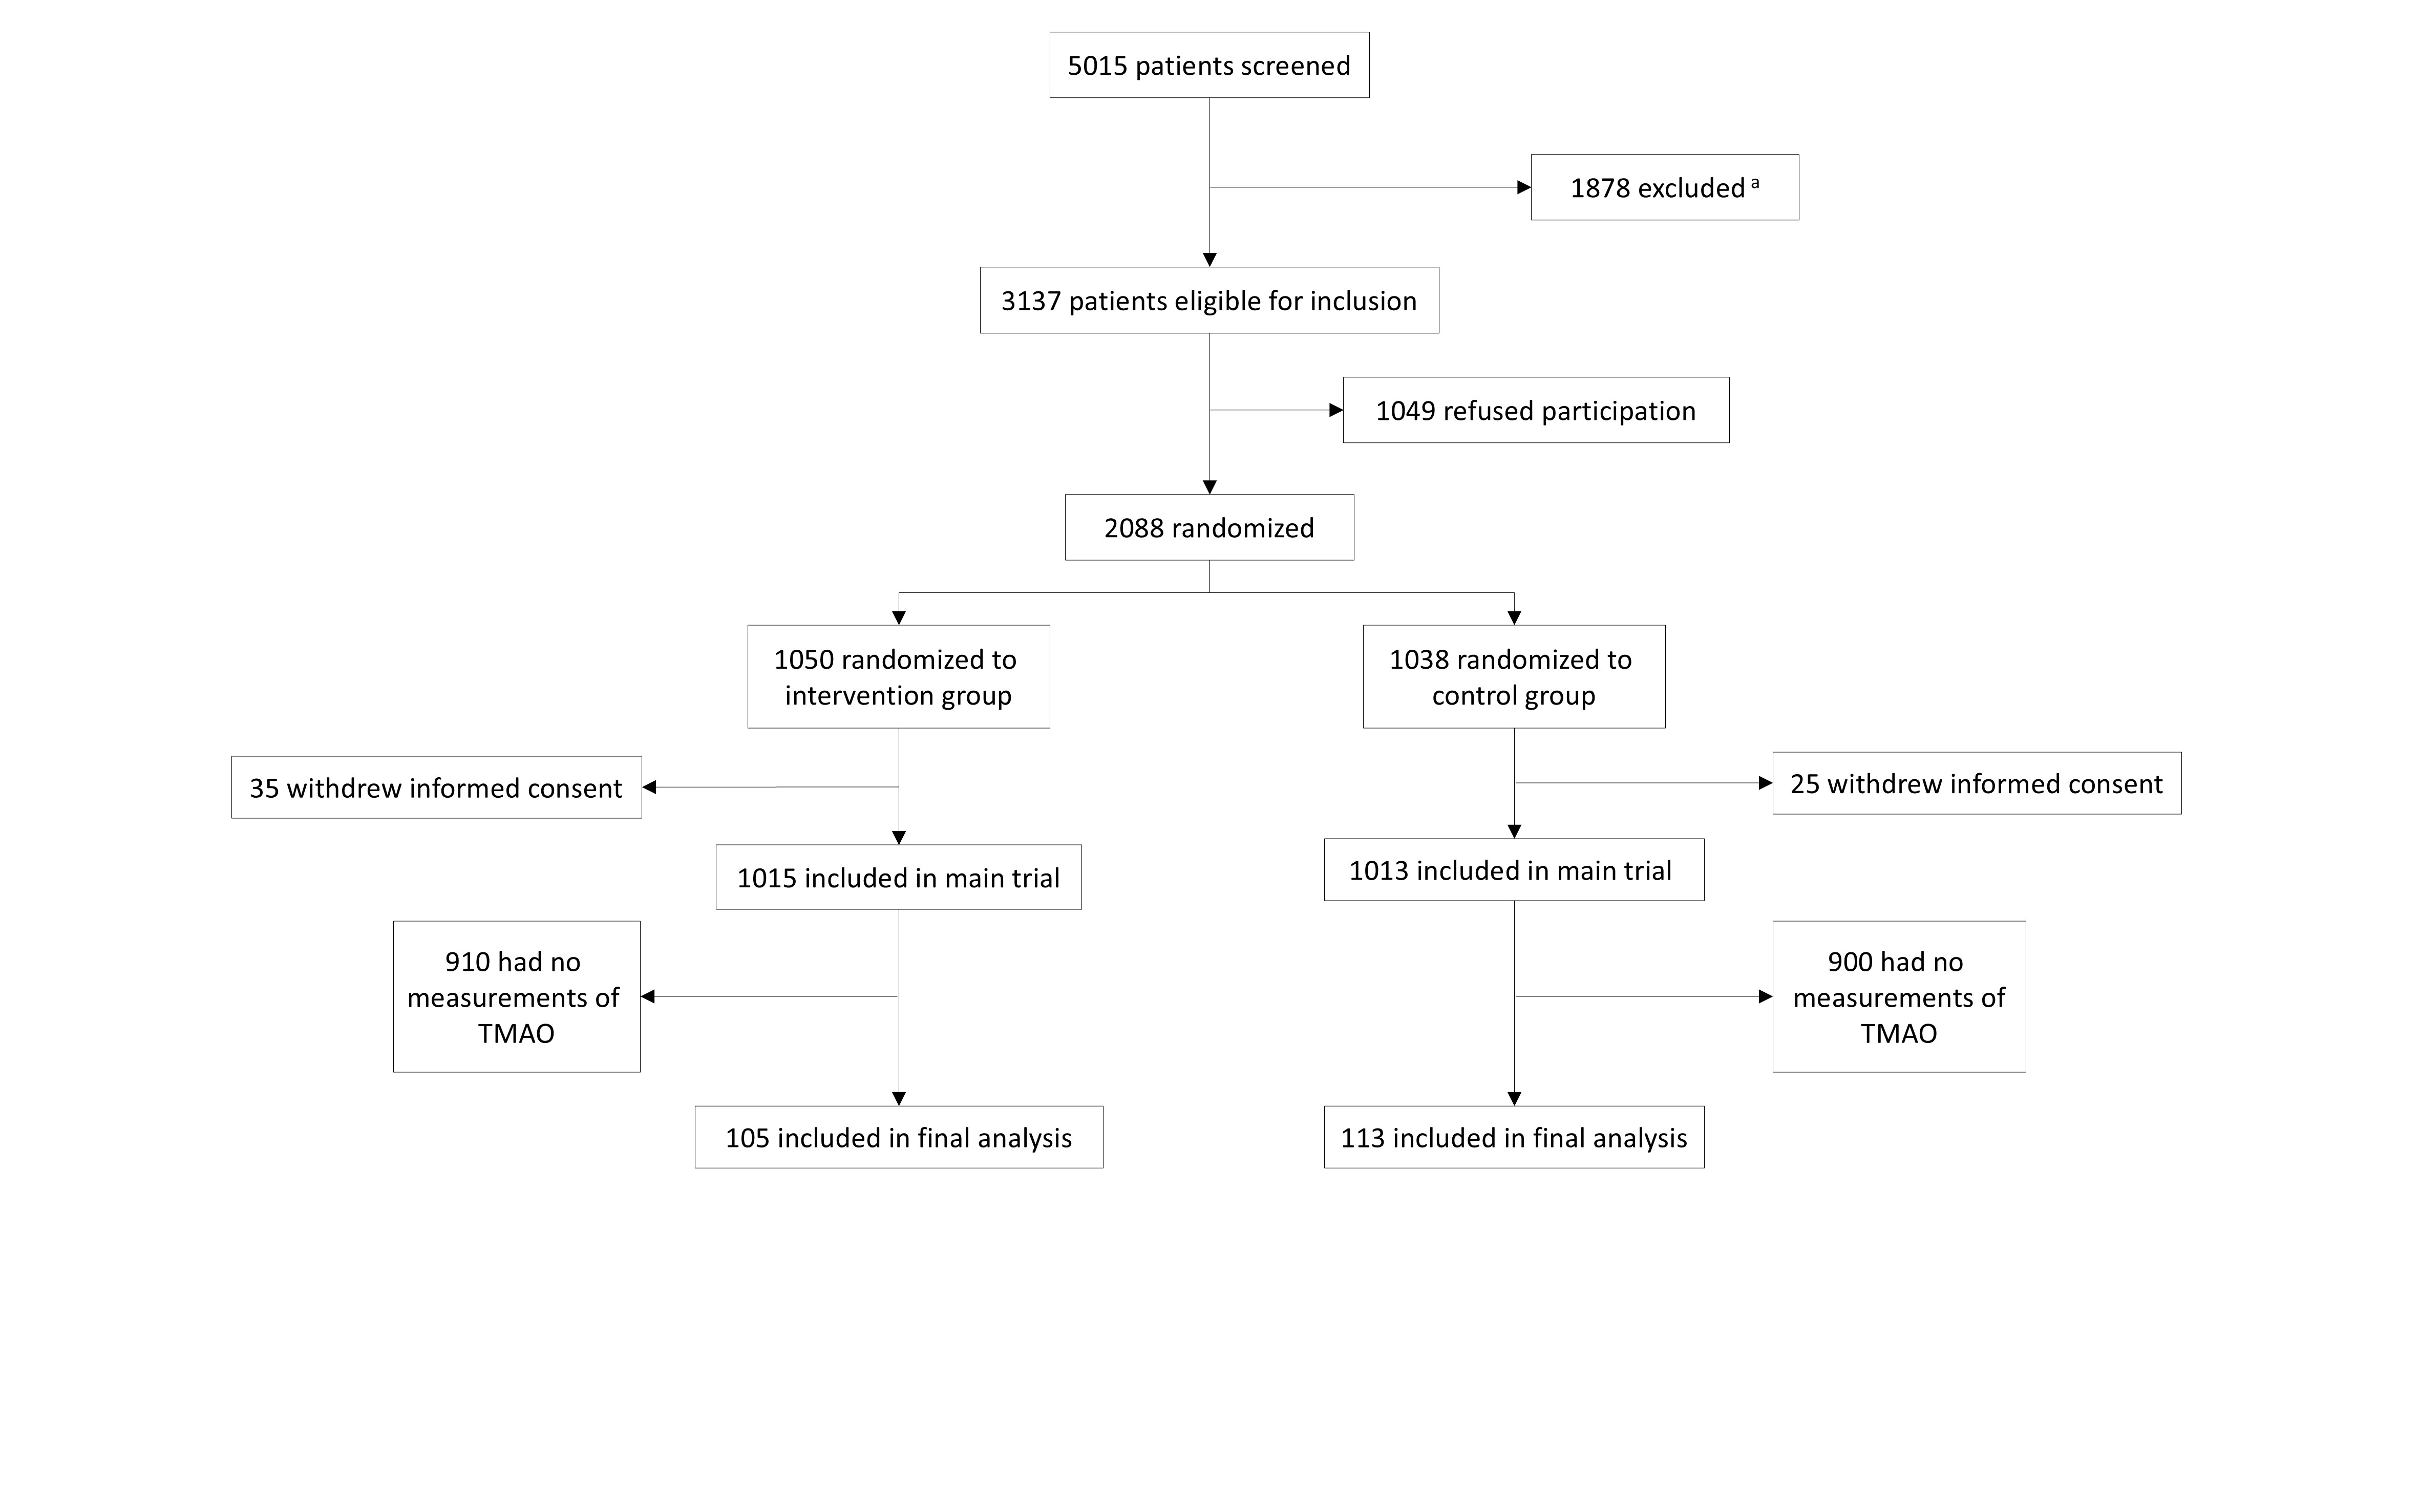


TMAO, Trimethylamine N-oxide

*a Reasons for exclusion: 145 surgical patients, 268 unable to ingest oral nutrition, 158 terminal condition, 719 already receiving nutritional therapy upon admission, 31 anorexia nervosa, 161 acute pancreatitis, 81 acute liver failure, 6 cystic fibrosis, 11 stem-cell transplantation, 27 malnutrition after gastric bypass operation, 43 contraindication against nutritional support, 228 earlier inclusion in the trial*

**Supplemental Figure A.2 Kaplan Meier survival analysis regarding TMAO quartiles and time to death within 5 years**


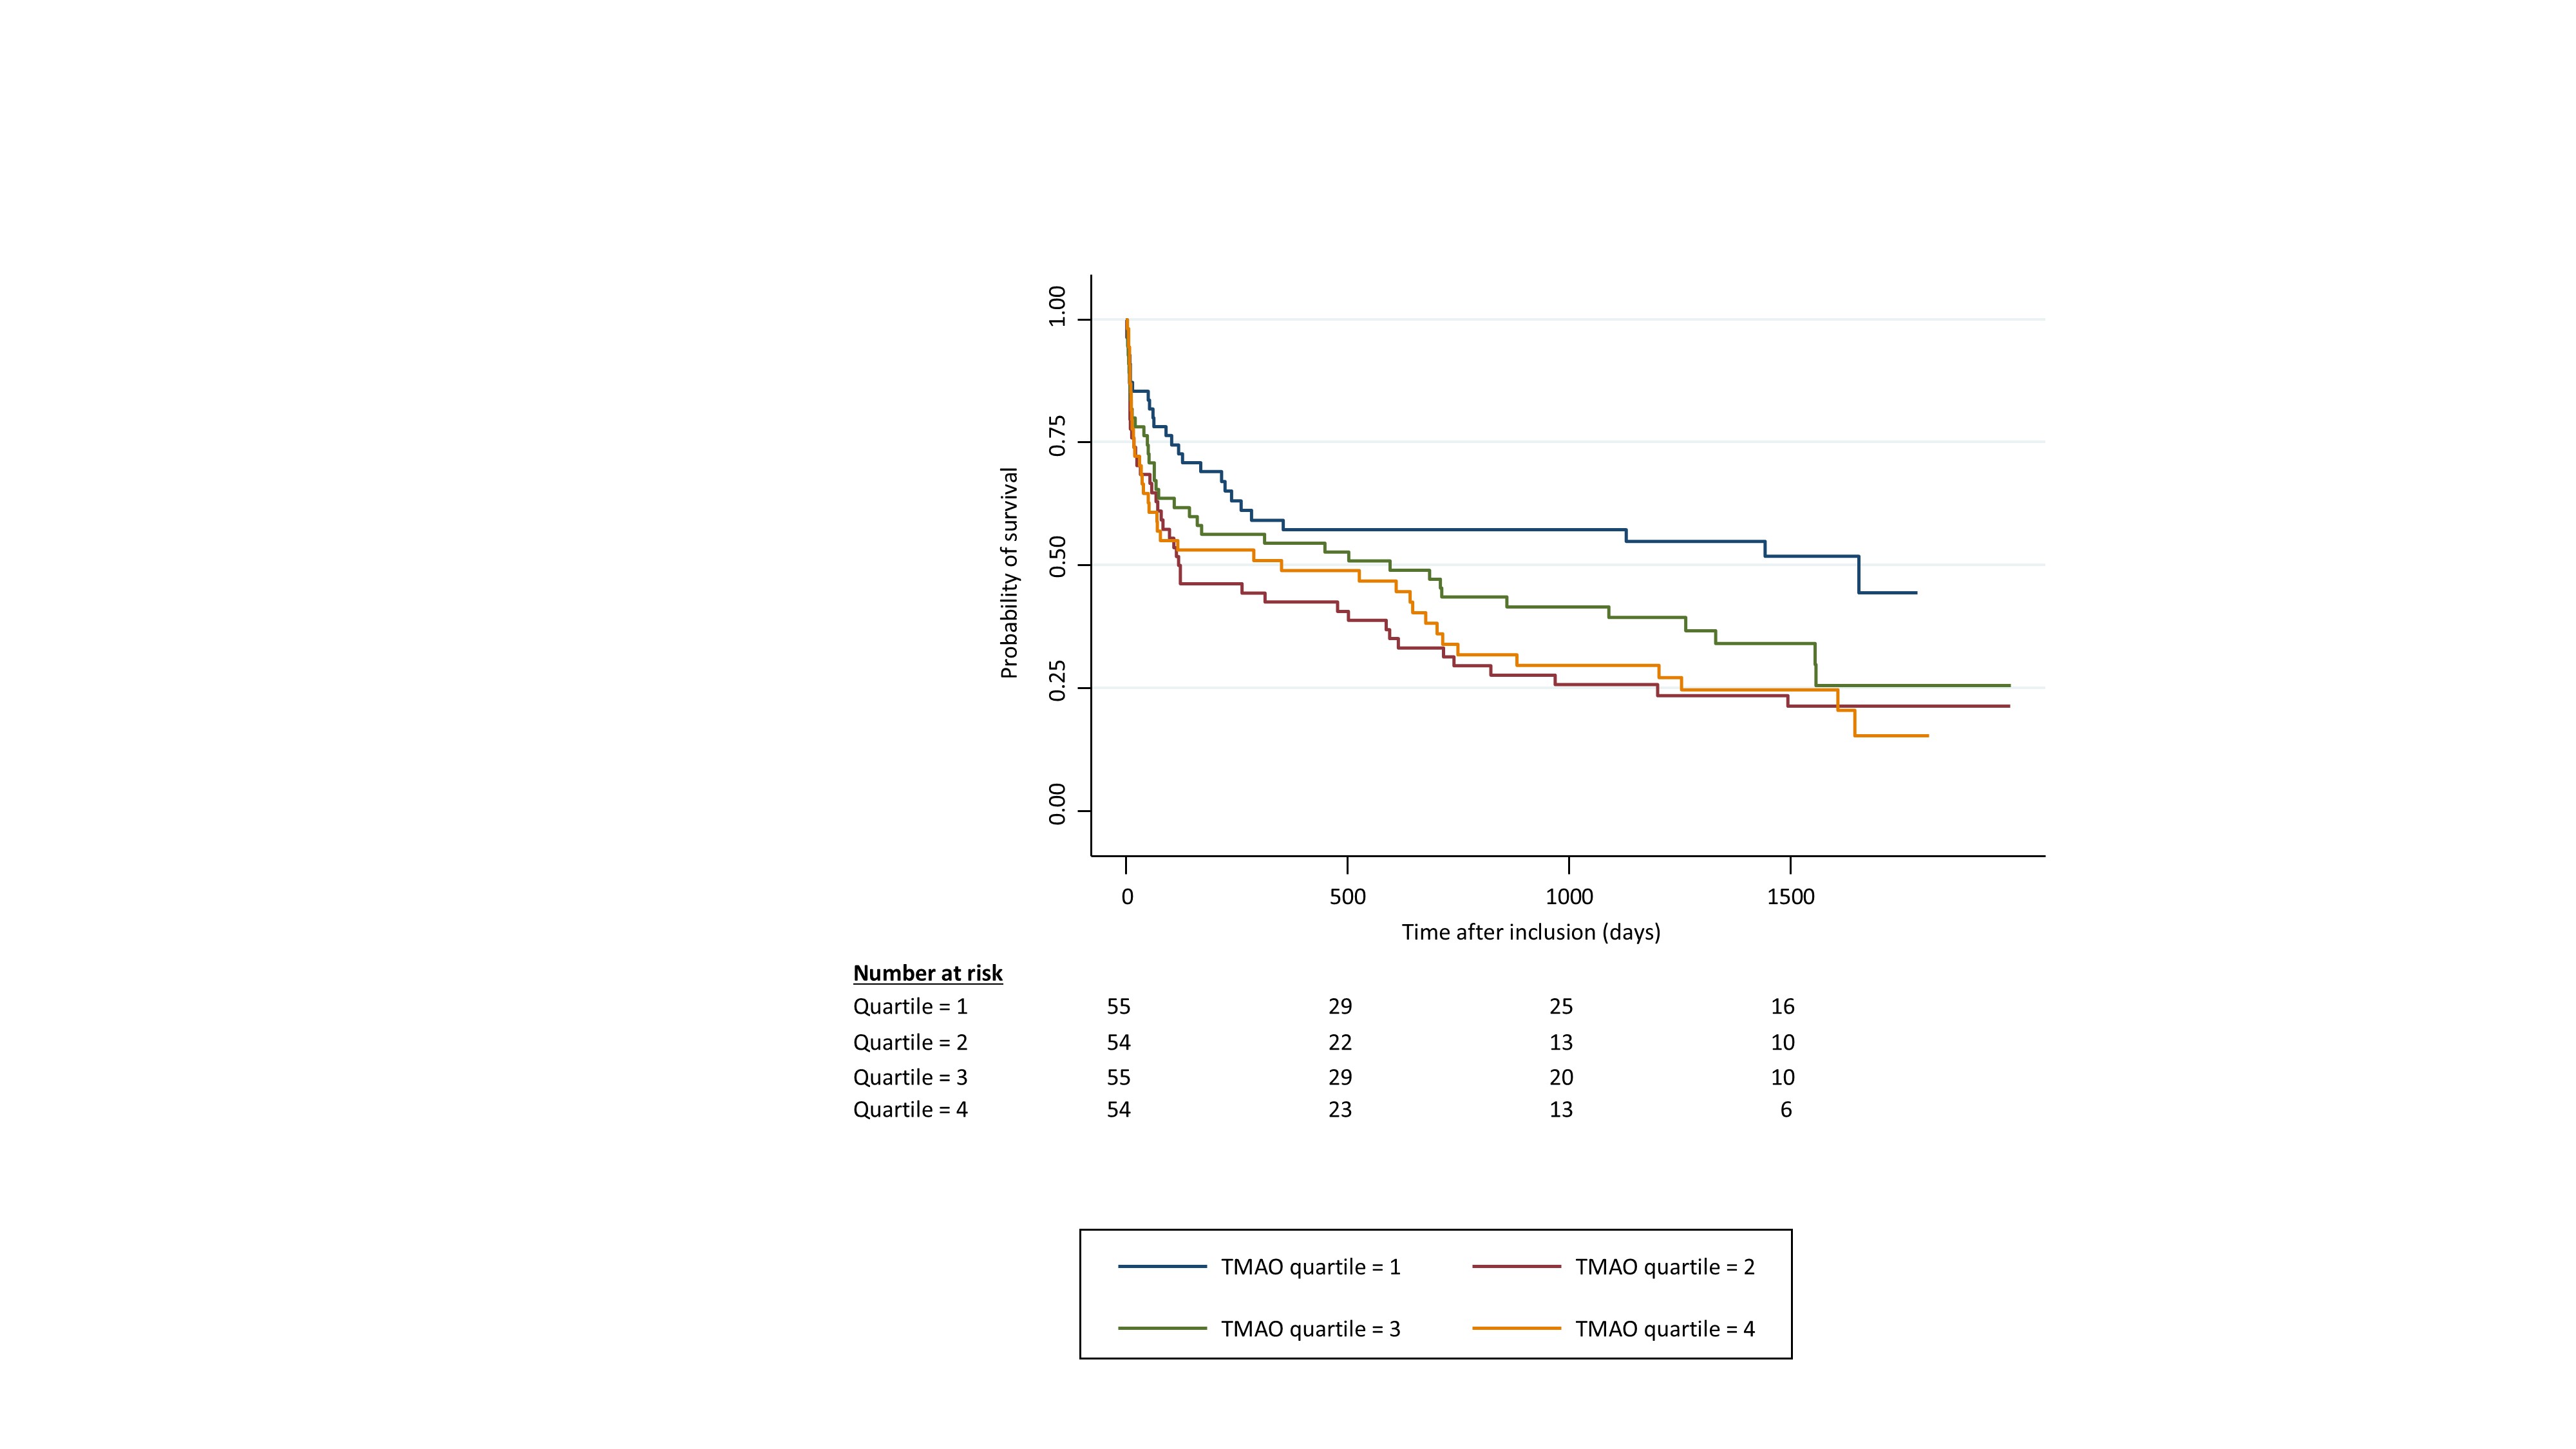


TMAO, Trimethylamine N-oxide

**Supplemental Figure A.3 Forest plot for the effect of nutritional therapy on major adverse cardiovascular events (MACE)**


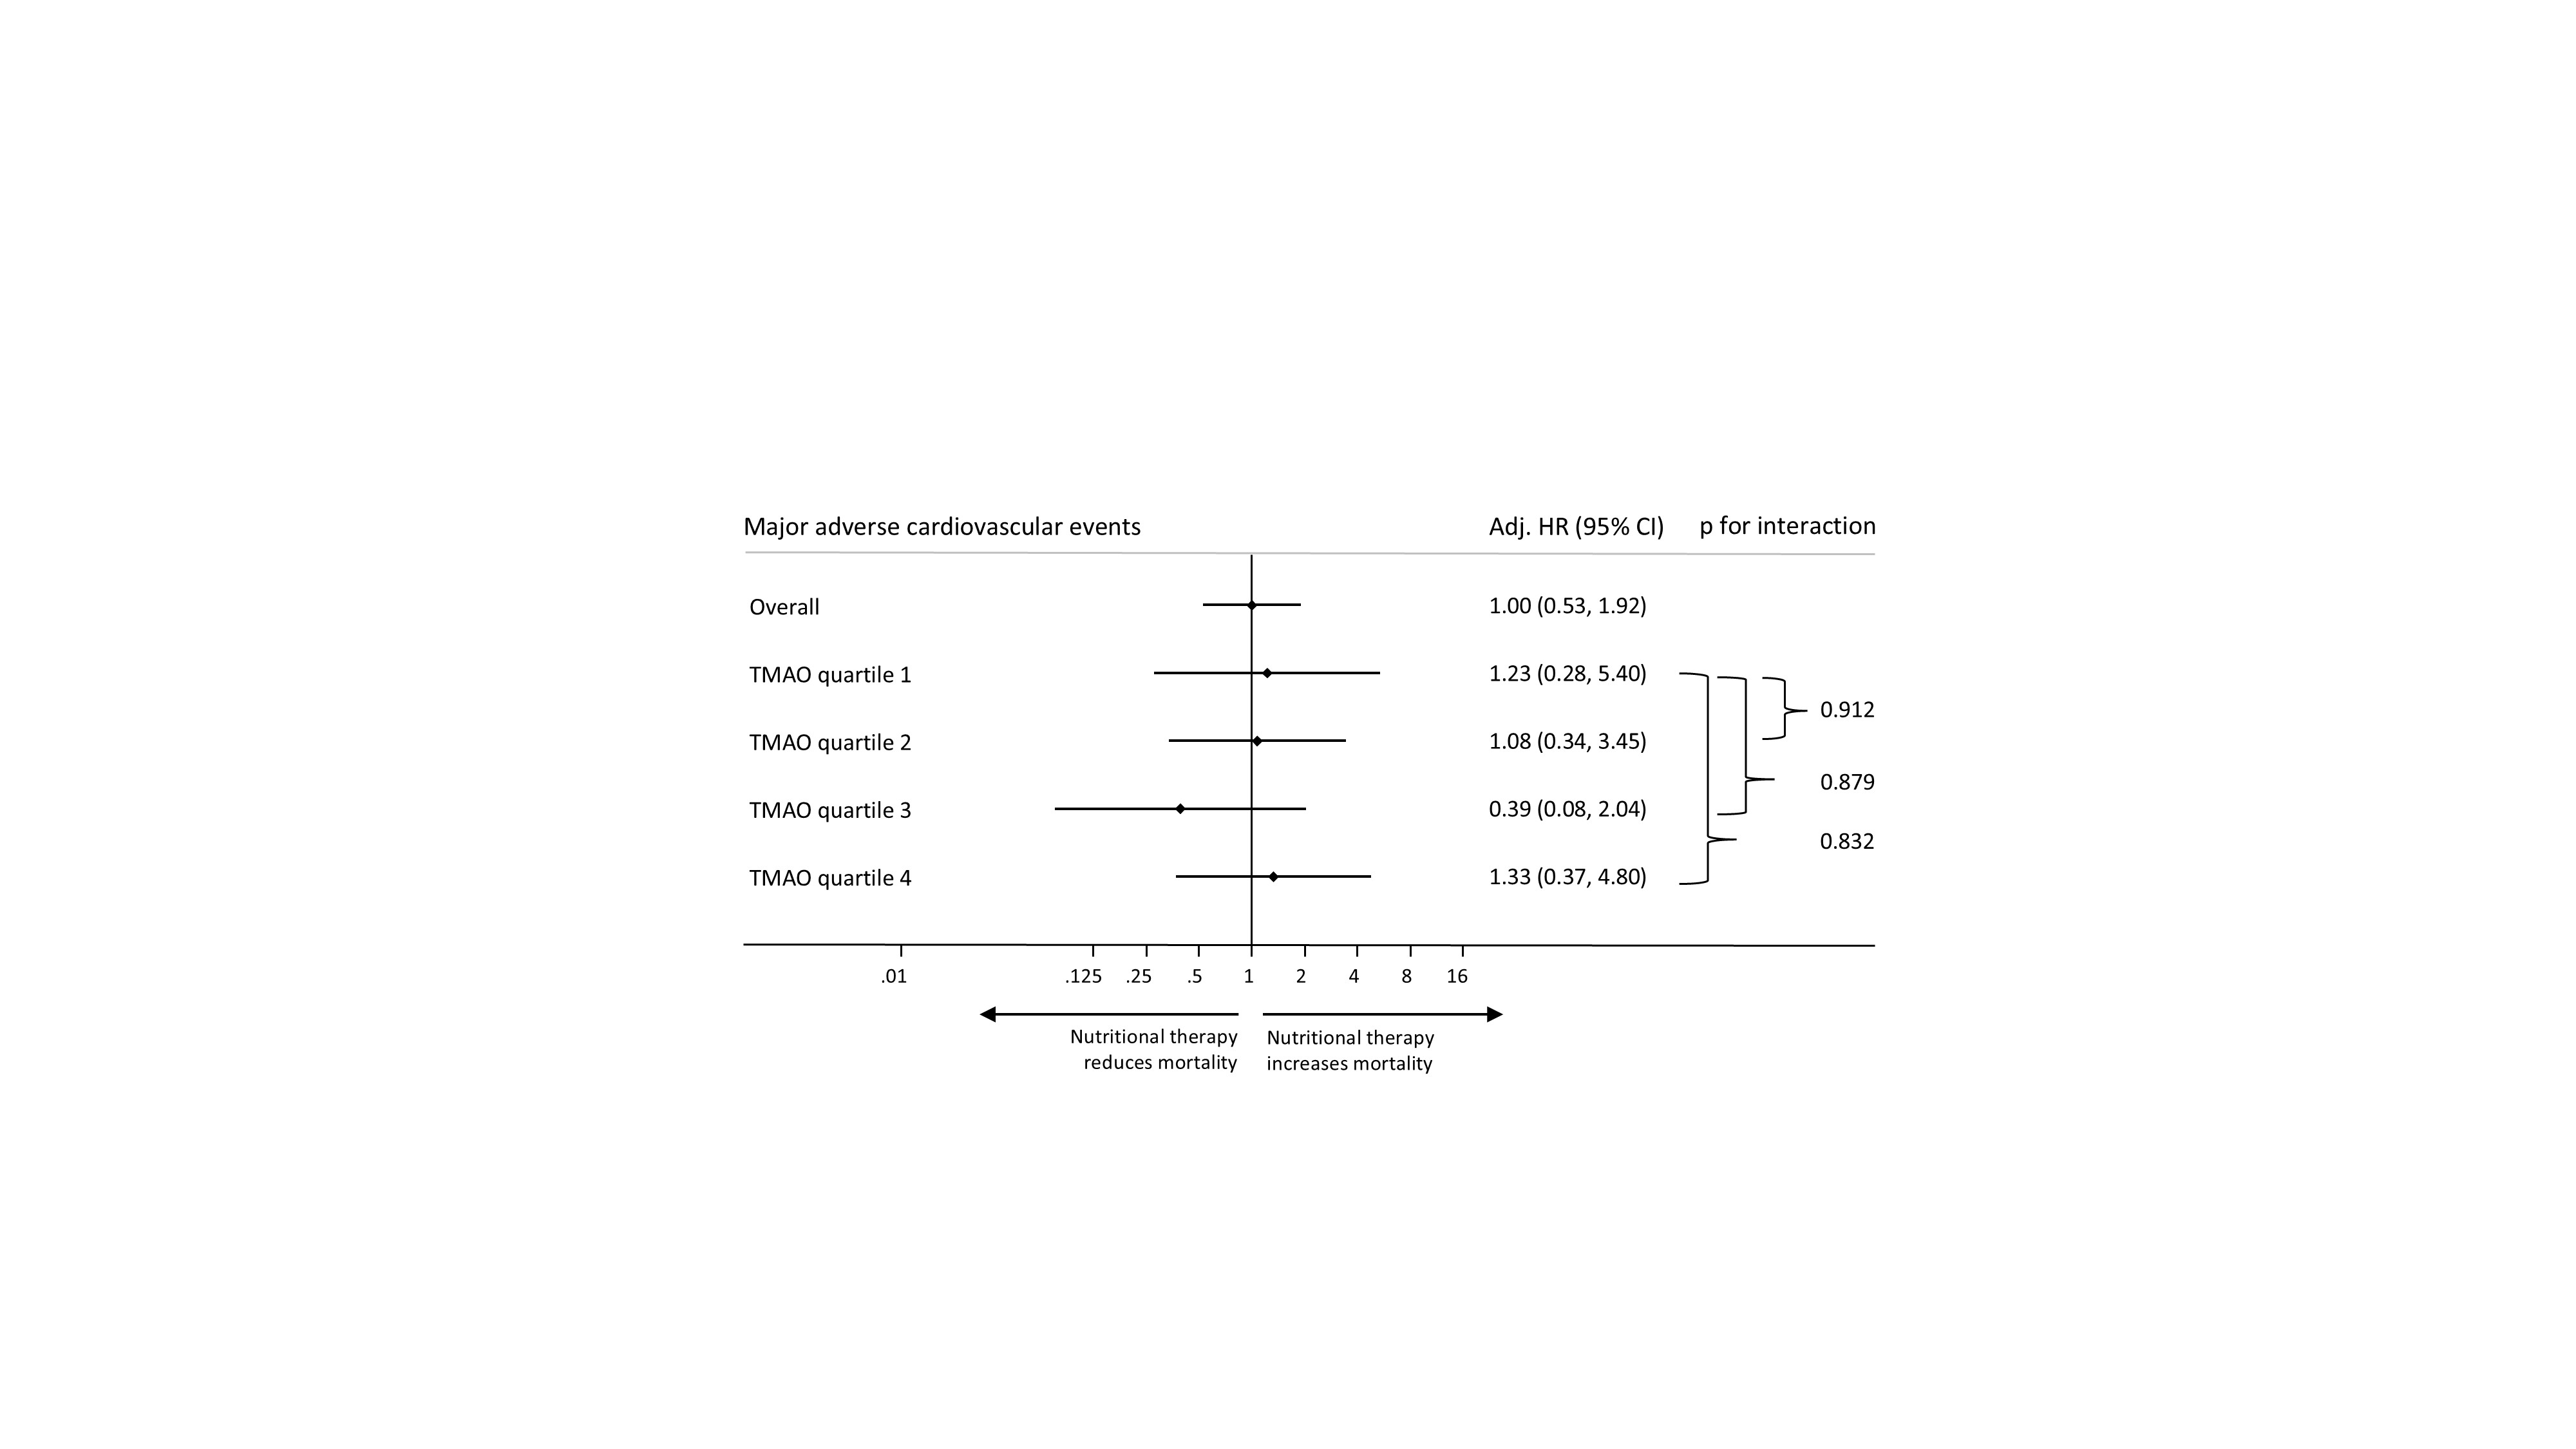


MACE, major adverse cardiovascular events. Adj. HR, adjusted hazard ratio. CI, confidence interval.

Adjusted for sex, age, NRS total score and randomization group.
